# Supplementary material for: Pigment epithelium-derived factor promotes tumor metastasis through an interaction with laminin receptor in hepatocellular carcinomas
Source: PubMed Central journal article supplement (PMC5596550; doi:10.1038/cddis.2017.359), 2017-08-03
Supplement: cddis2017359x1.pdf [file cddis2017359x1.pdf]

## Supplementary information

### **Pigment epithelium-derived factor promotes tumor metastasis through an interaction with laminin receptor in hepatocellular carcinomas**

Jianjing Hou <sup>1</sup>, Chao Ge <sup>1</sup>, Meiling Cui <sup>2</sup>, Tengfei Liu <sup>1</sup>, Xiaoqin Liu <sup>1</sup>, Hua Tian <sup>1</sup>, Fangyu Zhao <sup>1</sup>, Taoyang Chen <sup>3</sup>, Ying Cui <sup>4</sup>, Ming Yao <sup>1</sup>, Jinjun Li <sup>1</sup>, Hong Li <sup>1\*</sup>

<sup>1</sup> *State Key Laboratory of Oncogenes and Related Genes, Shanghai Cancer Institute, Renji Hospital, Shanghai Jiaotong University School of Medicine, Shanghai, China*

<sup>2</sup> *Heze Municipal Hospital, Shandong, China*

<sup>3</sup> *Qi Dong Liver Cancer Institute, Qi Dong, Jiangsu province, China*

<sup>4</sup> *Cancer Institute of Guangxi, Nanning, China*

\* *Corresponding author: [hongli@shsci.org](mailto:hongli@shsci.org)*

**Corresponding author:** Hong Li, Ph.D., State Key Laboratory of Oncogenes and Related Genes, Shanghai Cancer Institute, Renji Hospital, Shanghai Jiaotong University School of Medicine, 25/Ln 2200, Xietu Road, Shanghai 200032, China.

Tel: +86-21-64436627, Fax: +86-21-64432140, E-mail: [hongli@shsci.org](mailto:hongli@shsci.org)

## **Supplementary Materials and Methods**

### **Reagents**

ERK1/2 specific inhibitor U0126 and PD98059 was purchased from Sigma-Aldrich (St Louis, MO). Cells were exposed to U0126 (10  $\mu$ M) or PD98059 (30  $\mu$ M) or DMSO (1‰ final concentration) for 4 h.

### **Plasmid constructs**

The PEDF sequences were PCR amplified and cloned into pWPXL (Addgene, Cambridge, MA) by replacing the GFP fragment. The primers used for cloning are listed in Supplementary Table 3.

### **RNA interference-based gene knockdown experiment**

The short hairpin RNA (shRNA) targeting PEDF, LR and a negative control (Cat. No. GIEL2481103303) were purchased from Genechem (Shanghai, China). The small interfering RNA targeting slug and negative control were purchased from GenePharma (Shanghai, China). Different fragments were designed to target the corresponding gene transcripts, and the silencing effects of the sequences were validated by western blotting. The effective shRNA and siRNA sequences are shown in Supplementary Table 4, 5 and 6.

### **Western blotting**

Total proteins were extracted from cell lysates and separated by 10% sodium dodecyl sulfate-polyacrylamide gel electrophoresis (SDS-PAGE). The proteins were then transferred to polyvinylidene difluoride (PVDF) membranes (Sigma-Aldrich, St. Louis, MO). The electroblotted membranes were blocked with 5 % non-fat milk and then probed with primary antibodies overnight at 4°C. After being washed, the membranes were incubated with secondary antibodies.  $\beta$ -actin (Sigma-Aldrich, St. Louis, MO) levels were used as an internal control.

### **Quantitative real-time PCR**

Total RNA was isolated from cells using TRIzol reagent (Invitrogen, Carlsbad, CA, USA). Reverse transcription was performed using the PrimeScript RT Reagent Kit (Perfect Real Time) (TaKaRa Biotechnology, Shiga, Japan) according to the manufacturer's instructions. Primers for the quantitative RT-PCR are provided in Supplementary Table 7.

Figure S1

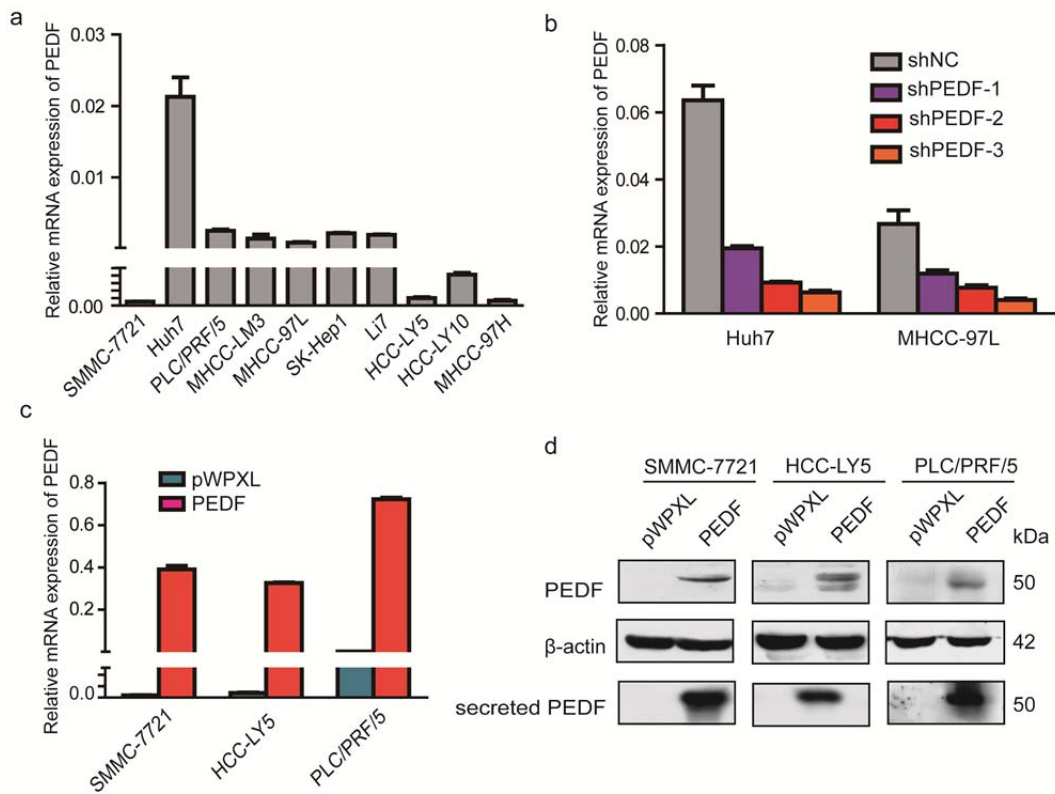

**Figure S1 PEDF expression in HCC cell lines.** (a) RT-qPCR was conducted to detect PEDF mRNA levels in HCC cell lines. (b) PEDF mRNA levels were detected by RT-qPCR in Huh7 and MHCC-97L cells lentivirally transduced with shPEDF and corresponding control. (c) The mRNA levels of PEDF were detected by RT-qPCR in SMMC-7721, HCC-LY5 and PLC/PRF/5 cells after infection with PEDF or corresponding control lentivirus. (d) PEDF protein was detected by western blotting analysis in SMMC-7721, HCC-LY5 and PLC/PRF/5 cells after infection with PEDF or corresponding control lentivirus.

Figure S2

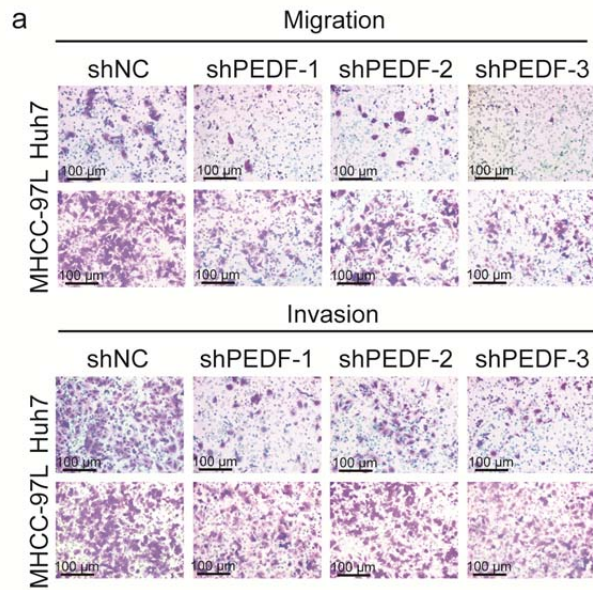

**Figure S2 Knockdown of PEDF inhibited HCC cell migration and invasion *in vitro*.** (a) The *in vitro* migration and invasion ability of Huh7 and MHCC-97L cells lentivirally transfected with shPEDF were assessed using a transwell assay; shNC was used as the control.

Figure S3

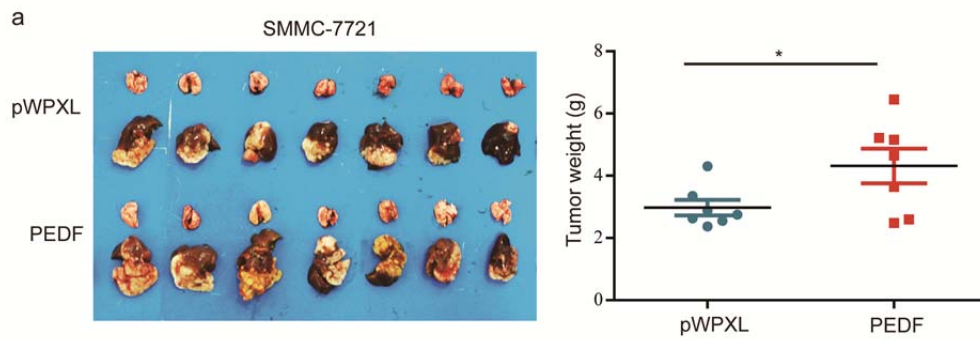

**Figure S3 PEDF promoted HCC cell proliferation *in vivo*.** (a) SMMC-7721 cells stably overexpressing PEDF were injected orthotopically into nude mice; empty vectors were used as a corresponding control. The tumors were removed from the nude mouse after 4 weeks. Representative images are shown, along with the weight of the livers with tumors. \*,  $P < 0.05$ .

Figure S4

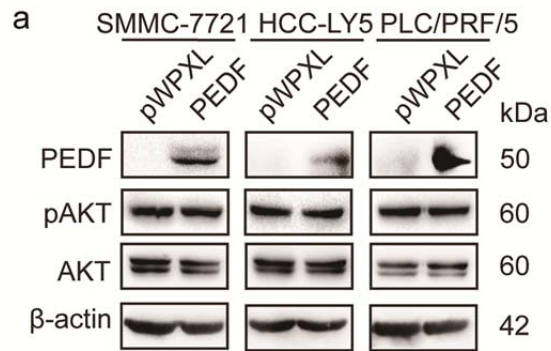

**Figure S4 AKT signaling pathways in PEDF overexpression HCC cells. (a)**

Western blotting analysis of pAKT and AKT in PEDF-overexpressing SMMC-7721, HCC-LY5 and PLC/PRF/5.

Figure S5

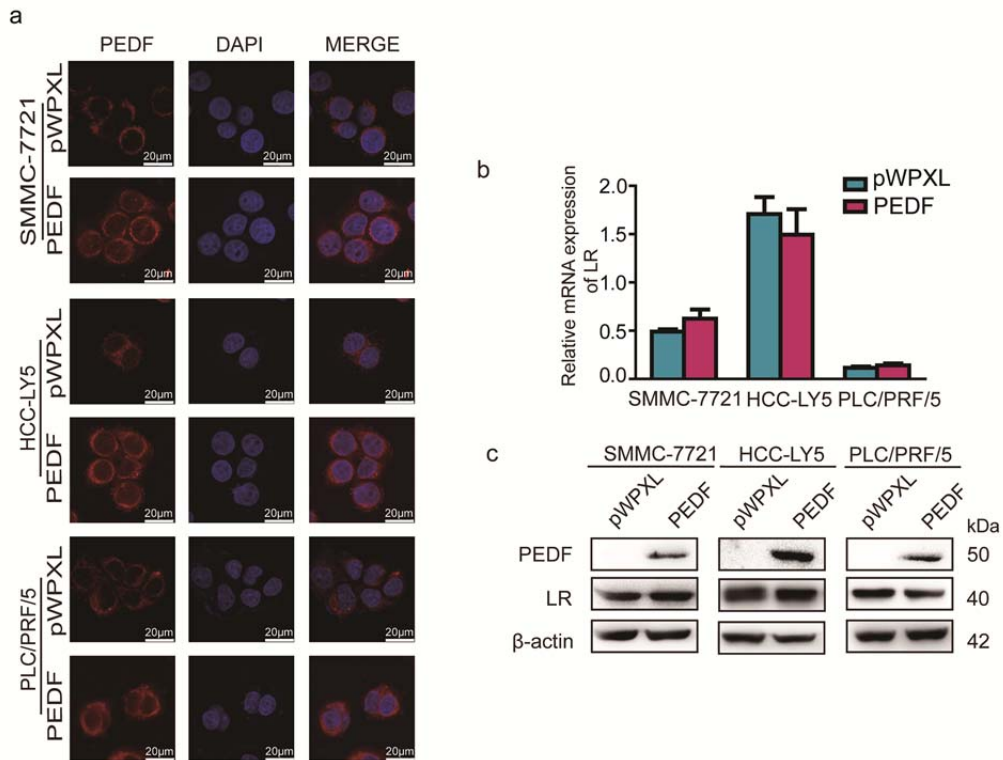

**Figure. S5** (a) Immunofluorescence staining was used to examine PEDF expression in PEDF-overexpressing SMMC-7721, HCC-LY5 and PLC/PRF/5 cells. Representative images are shown. (b) LR mRNA levels were detected by RT-qPCR in PEDF-overexpressed SMMC-7721, HCC-LY5 and PLC/PRF/5 cells. (c) LR protein levels were detected by western blotting in PEDF-overexpressing SMMC-7721, HCC-LY5 and PLC/PRF/5 cells.



Figure S6

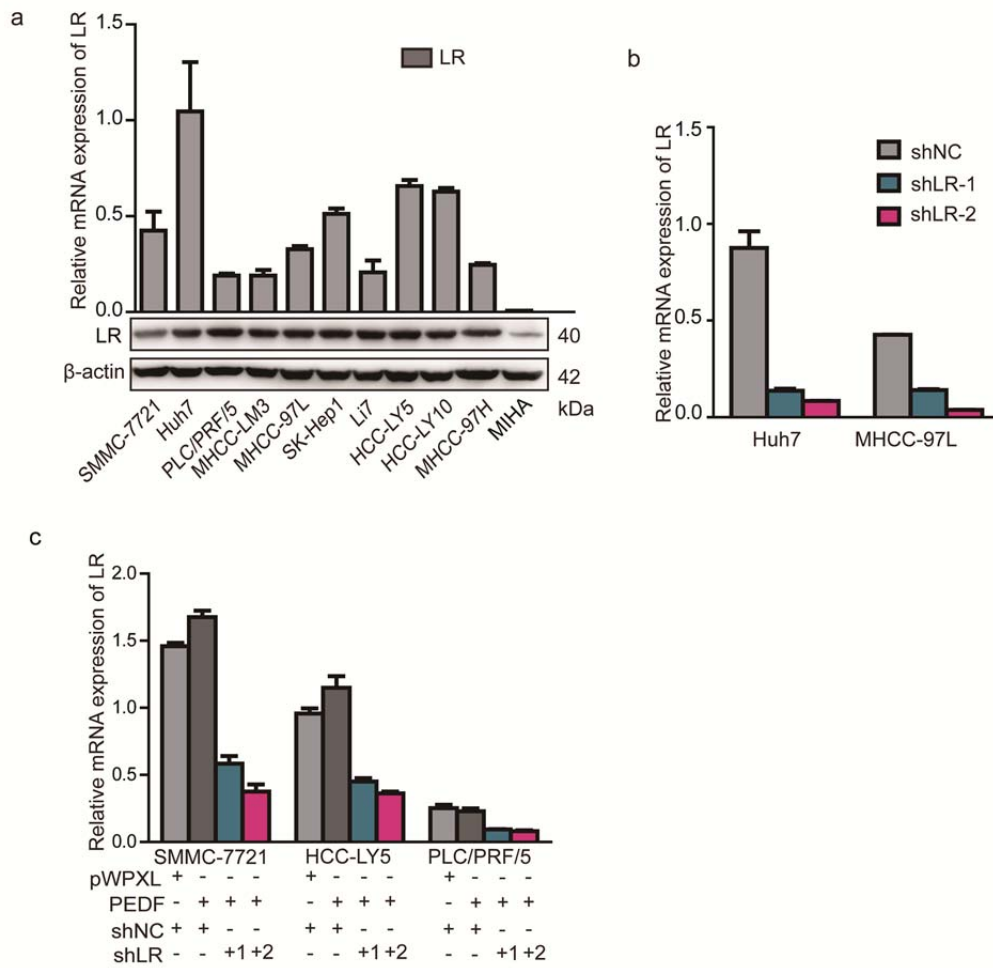

**Figure S6 LR expression in HCC cell lines.** (a) RT-qPCR and western blotting was conducted respectively to detect mRNA and protein levels of LR in HCC cell lines and immortalized liver cell line MIHA. (b) LR mRNA levels were detected by RT-qPCR in Huh7 and MHCC-97L cells lentivirally transduced with shLR. (c) PEDF-overexpressing SMMC-7721, HCC-LY5 and PLC/PRF/5 cells were lentivirally transduced with shRNA targeted to LR as indicated. The mRNA levels of LR were detected by RT-qPCR.

**Supplementary Table 1 Relationship between PEDF protein expression and clinicopathological features in HCC tissues**

| Clinicopathological Features | Number of cases | PEDF expression |            | P Value |
|------------------------------|-----------------|-----------------|------------|---------|
|                              |                 | Low N (%)       | High N (%) |         |
| Age (years)                  |                 |                 |            |         |
| ≤60                          | 121             | 46(85.20)       | 75(79.80)  | 0.413   |
| >60                          | 27              | 8(14.80)        | 19(20.20)  |         |
| Gender                       |                 |                 |            |         |
| Male                         | 122             | 41(75.90)       | 81(85.30)  | 0.155   |
| Female                       | 27              | 13(24.10)       | 14(14.70)  |         |
| Tumor size                   |                 |                 |            |         |
| ≤5cm                         | 72              | 25(46.30)       | 47(52.80)  | 0.450   |
| >5cm                         | 71              | 29(53.70)       | 42(47.20)  |         |
| AFP (ng/ml)                  |                 |                 |            |         |
| ≤20                          | 52              | 18(33.30)       | 34(36.60)  | 0.693   |
| >20                          | 95              | 36(66.70)       | 59(63.40)  |         |
| HBV infection                |                 |                 |            |         |
| Negative                     | 25              | 9(17.60)        | 16(17.40)  | 0.969   |
| Positive                     | 118             | 42(82.40)       | 76(82.60)  |         |
| Cirrhosis                    |                 |                 |            |         |
| Absent                       | 12              | 3(5.60)         | 9(9.50)    | 0.398   |
| Present                      | 137             | 51(94.40)       | 86(90.50)  |         |

---

|                          |     |            |           |       |
|--------------------------|-----|------------|-----------|-------|
| Histological grade       |     |            |           |       |
| I, II                    | 71  | 21(38.90)  | 50(52.60) | 0.106 |
| III, IV                  | 78  | 33(61.10)  | 45(47.40) |       |
| Venous invasion          |     |            |           |       |
| Absent                   | 133 | 50(92.59)  | 83(87.37) | 0.322 |
| Present                  | 16  | 4(7.41)    | 12(12.63) |       |
| Extra-hepatic metastasis |     |            |           |       |
| Absent                   | 146 | 54(100.00) | 92(97.87) | 0.280 |
| Present                  | 2   | 0(0.00)    | 2(2.13)   |       |
| Lymph node metastasis    |     |            |           |       |
| Absent                   | 145 | 54(100.00) | 91(96.81) | 0.185 |
| Present                  | 3   | 0(0.00)    | 3(3.19)   |       |

---

AFP, alpha-fetoprotein. N, Number of cases. *P* value represents the probability from a Chi-square test for different immunohistochemical scores of PEDF in HCC tissues.

**Supplementary Table 2 Antibodies used and dilutions**

| Antibody                        | Source     | Catalogue number | Dilution | Application | Company        |
|---------------------------------|------------|------------------|----------|-------------|----------------|
| Primary antibodies for WB/CO-IP |            |                  |          |             |                |
| PEDF                            | Mouse IgG  | sc390172         | 1:100    | WB          | Santa Cruz     |
| LR                              | Mouse IgG  | sc74531          | 1:100    | WB          | Santa Cruz     |
| N-cadherin                      | Mouse IgG  | Ab124397         | 1:500    | WB          | Abcam          |
| E-cadherin                      | Rabbit IgG | sc7870           | 1:300    | WB          | Santa Cruz     |
| Slug                            | Rabbit IgG | CST9585          | 1:300    | WB          | Cell signaling |
| pERK                            | Rabbit IgG | CST9018          | 1:1000   | WB          | Cell signaling |
| ERK                             | Rabbit IgG | CST4348          | 1:1000   | WB          | Cell signaling |
| $\beta$ -actin                  | Mouse mAb  | A1978            | 1:10000  | WB          | Sigma-Aldrich  |
| PEDF                            | Mouse IgG  | sc390172         | 1ug/mg   | CO-IP       | Santa Cruz     |
|                                 |            |                  | protein  |             |                |
| LR                              | Rabbit IgG | Sc20979          | 1ug/mg   | CO-IP       | Santa Cruz     |
|                                 |            |                  | protein  |             |                |
| ATGL                            | Rabbit IgG | MA5-14990        | 1:50     | CO-IP       | ThermoFisher   |
|                                 |            |                  |          |             | SCIENTIFIC     |
| ATGL                            | Goat IgG   | Sc50222          | 1ug/mg   | CO-IP       | Santa Cruz     |
|                                 |            |                  | protein  |             |                |

Secondary antibodies for WB/CO-IP

|                                |            |  |            |        |       |                |
|--------------------------------|------------|--|------------|--------|-------|----------------|
| HRP-anti-Mouse IgG             | goat       |  | A0545      | 1:3000 | WB    | Sigma-Aldrich  |
| HRP-anti-Rabbit IgG            | goat       |  | Sc-2060    | 1:4000 | WB    | Santa Cruz     |
| Anti-Mouse IgG                 | Rabbit     |  | 34519      | 1:1000 | CO-IP | ROCKLAND       |
| HRP                            |            |  |            |        |       |                |
| Anti-Rabbit IgG                | Mouse      |  | 34665      | 1:1000 | CO-IP | ROCKLAND       |
| HRP                            |            |  |            |        |       |                |
| Anti-Goat IgG                  | Goat       |  | 33924      | 1:1000 | CO-IP | ROCKLAND       |
| HRP                            |            |  |            |        |       |                |
| Primary antibodies for IHC     |            |  |            |        |       |                |
| PEDF                           | Mouse IgG  |  | sc390172   | 1:10   | IHC   | Santa Cruz     |
| LR                             | Rabbit IgG |  | sc20979    | 1:25   | IHC   | Santa Cruz     |
| N-cadherin                     | Rabbit IgG |  | NB600-1038 | 1:100  | IHC   | Novus          |
| E-cadherin                     | Rabbit IgG |  | sc7870     | 1:10   | IHC   | Santa Cruz     |
| slug                           | Rabbit IgG |  | CST9585    | 1:100  | IHC   | Cell signaling |
| CD31                           | Rabbit IgG |  | ab28364    | 1:25   | IHC   | Abcam          |
| Secondary antibodies for IHC   |            |  |            |        |       |                |
| EnViSion                       | Detection  |  | Kit K5007  |        | IHC   | DAKO           |
| (Peroxidase/DAB; Rabbit/mouse) |            |  |            |        |       |                |

---

**Supplementary Table 3 Primers for Cloning plasmid**

---

| Name   | Primer Sequence (5'-3')        |
|--------|--------------------------------|
| PEDF-F | CGACGCGTATGCAGGCCCTGGTGCTACTCC |
| PEDF-R | GGAATTCTTAGGGGCCCTGGGGTCCA     |

---

**Supplementary Table 4 Sequences used for to silence PEDF**

---

| Name     | Primer Sequence (5'-3') |
|----------|-------------------------|
| shNC     | TTCTCCGAACGTGTCACGT     |
| shPEDF-1 | TGTTTGATTCACCAGACTT     |
| ShPEDF-2 | GAAGCATGAGTATCATCTT     |
| shPEDF-3 | AGCGAACAGAATCCATCAT     |

---

**Supplementary Table 5 Sequences used for to silence LR**

---

| Name   | Primer Sequence (5'-3') |
|--------|-------------------------|
| shNC   | TTCTCCGAACGTGTCACGT     |
| shLR-1 | TCTGTACTTCTACAGAGAT     |
| shLR-2 | TGCAATTGTTGCCATTGAA     |

---

**Supplementary Table 6 Sequences used for to silence slug**

---

| Name     | Primer Sequence (5'-3') |
|----------|-------------------------|
| siNC     | UUCUCCGAACGUGUCACGUTT   |
| sislug-1 | GCUUCAAGGACACAUUAGATT   |
| sislug-2 | CCUGCACAAACAUGAGGAATT   |

---

**Supplementary Table 7 Primer for the Real-time PCR**

---

| Name   | Primer Sequence (5'-3') |
|--------|-------------------------|
| PEDF-F | CCTTGACCGGAAGCATGAGT    |
| PEDF-R | GGATTGCAGCTTCATCTCCTG   |
| LR-F   | TGCAGCAGGAACCCACTTAG    |
| LR-R   | GCAAACCTTCAGCACAGCCCT   |

---
